# Supplementary material
Source: PubMed Central journal article supplement (PMC3183848)
Supplement: hdy201037x1.pdf [file hdy201037x1.pdf]

# Supplementary information 1

List of ponds sampled. Genetic samples sometime included juveniles or unsexed adults not listed under males or females.  $H_E$  = expected heterozygosity.

| Pond                          | Country               | Latitude  | Longitude | Males > 55mm (LL>50) |     |    |     |     | $n_m$ | Females > 55mm (LL>50) |     |    |     |     | $n_f$ | Genetic samples |          |       |          |
|-------------------------------|-----------------------|-----------|-----------|----------------------|-----|----|-----|-----|-------|------------------------|-----|----|-----|-----|-------|-----------------|----------|-------|----------|
|                               |                       |           |           | LL                   | LLR | LR | LRR | RRR |       | LL                     | LLR | LR | LRR | RRR |       | $n_L$           | $H_{EL}$ | $n_R$ | $H_{ER}$ |
| <b>All-hybrid populations</b> |                       |           |           |                      |     |    |     |     |       |                        |     |    |     |     |       |                 |          |       |          |
| 1a                            | Denmark, Jutland      | 56°02'54" | 09°40'29" | 0                    | 2   | 1  | 0   | 0   | 3     | 0                      | 3   | 8  | 5   | 0   | 16    | 24              | 0.085    | 24    | 0.102    |
| 1b                            | Denmark, Jutland      | 56°02'48" | 09°39'28" | 0                    | 7   | 8  | 0   | 0   | 15    | 0                      | 2   | 8  | 5   | 0   | 15    | 39              | 0.132    | 35    | 0.100    |
| 2a                            | Denmark, Jutland      | 56°09'03" | 10°31'57" | 0                    | 3   | 12 | 0   | 0   | 15    | 0                      | 2   | 12 | 1   | 0   | 15    | 35              | 0.003    | 31    | 0.028    |
| 2b                            | Denmark, Jutland      | 56°07'34" | 10°32'28" | 0                    | 11  | 4  | 0   | 0   | 15    | 0                      | 3   | 7  | 5   | 0   | 15    | 44              | 0.000    | 35    | 0.022    |
| 3a                            | Denmark, Jutland      | 54°56'45" | 08°50'47" | 0                    | 4   | 4  | 7   | 0   | 15    | 0                      | 1   | 9  | 5   | 0   | 15    | 35              | 0.051    | 42    | 0.028    |
| 3b                            | Denmark, Jutland      | 54°57'46" | 08°49'27" | 0                    | 5   | 7  | 1   | 0   | 13    | 0                      | 2   | 15 | 1   | 0   | 18    | 38              | 0.101    | 33    | 0.087    |
| 4a                            | Denmark, Jutland      | 54°55'42" | 09°35'06" | 0                    | 13  | 7  | 1   | 0   | 21    | 0                      | 4   | 6  | 4   | 0   | 14    | 52              | 0.087    | 40    | 0.016    |
| 4b                            | Denmark, Jutland      | 54°55'38" | 09°33'60" | 0                    | 9   | 7  | 0   | 0   | 16    | 0                      | 4   | 8  | 2   | 0   | 14    | 43              | 0.105    | 32    | 0.028    |
| 4z                            | Denmark, Jutland      | 54°51'54" | 09°23'42" | 0                    | 12  | 2  | 0   | 0   | 14    | 0                      | 4   | 5  | 0   | 0   | 9     | 39              | 0.090    | 23    | 0.000    |
| 5a                            | Denmark, Romsø        | 55°30'56" | 10°47'08" | 0                    | 8   | 0  | 0   | 0   | 8     | 0                      | 6   | 13 | 3   | 0   | 22    | 44              | 0.161    | 33    | 0.254    |
| 5b                            | Denmark, Romsø        | 55°30'38" | 10°47'44" | 0                    | 8   | 2  | 0   | 0   | 10    | 0                      | 3   | 6  | 11  | 0   | 20    | 41              | 0.160    | 41    | 0.189    |
| 6                             | Denmark, Funen        | 55°22'41" | 09°55'59" | 0                    | 0   | 2  | 0   | 0   | 2     | 0                      | 0   | 3  | 20  | 0   | 23    | 25              | 0.083    | 45    | 0.131    |
| 7a                            | Denmark, Funen        | 55°06'10" | 10°30'04" | 0                    | 10  | 8  | 0   | 0   | 18    | 0                      | 7   | 5  | 0   | 0   | 12    | 47              | 0.124    | 30    | 0.230    |
| 7b                            | Denmark, Funen        | 55°07'09" | 10°30'30" | 0                    | 6   | 13 | 0   | 0   | 19    | 0                      | 3   | 3  | 4   | 0   | 10    | 38              | 0.161    | 33    | 0.182    |
| 8a                            | Denmark, Lyø          | 55°02'50" | 10°09'15" | 0                    | 0   | 7  | 4   | 0   | 11    | 0                      | 0   | 3  | 16  | 0   | 19    | 30              | 0.175    | 50    | 0.173    |
| 8b                            | Denmark, Lyø          | 55°02'38" | 10°09'25" | 0                    | 0   | 14 | 0   | 0   | 14    | 0                      | 0   | 6  | 10  | 0   | 16    | 30              | 0.139    | 40    | 0.164    |
| 9a                            | Denmark, Avernakø     | 55°01'26" | 10°15'09" | 0                    | 10  | 4  | 0   | 0   | 14    | 0                      | 3   | 14 | 0   | 0   | 17    | 44              | 0.241    | 31    | 0.148    |
| 9b                            | Denmark, Avernakø     | 55°00'44" | 10°19'56" | 0                    | 3   | 1  | 0   | 0   | 4     | 0                      | 3   | 5  | 4   | 0   | 12    | 22              | 0.176    | 20    | 0.168    |
| 10a                           | Denmark, Hjortø       | 54°57'52" | 10°29'30" | 0                    | 9   | 2  | 0   | 0   | 11    | 0                      | 2   | 12 | 4   | 0   | 18    | 40              | 0.099    | 33    | 0.092    |
| 10b                           | Denmark, Hjortø       | 54°57'43" | 10°29'09" | 0                    | 4   | 7  | 0   | 0   | 11    | 0                      | 1   | 13 | 5   | 0   | 19    | 35              | 0.083    | 35    | 0.128    |
| 11a                           | Denmark, Ærø          | 54°52'18" | 10°20'14" | 0                    | 7   | 3  | 1   | 0   | 11    | 0                      | 4   | 13 | 2   | 0   | 19    | 41              | 0.218    | 33    | 0.275    |
| 11b                           | Denmark, Ærø          | 54°51'29" | 10°23'33" | 0                    | 2   | 6  | 0   | 0   | 8     | 0                      | 1   | 15 | 6   | 0   | 22    | 33              | 0.230    | 36    | 0.268    |
| 12a                           | Denmark, Langeland    | 54°50'33" | 10°44'60" | 0                    | 9   | 3  | 3   | 0   | 15    | 0                      | 2   | 6  | 7   | 0   | 15    | 41              | 0.161    | 40    | 0.247    |
| 12b                           | Denmark, Langeland    | 54°50'46" | 10°45'05" | 0                    | 14  | 2  | 0   | 0   | 16    | 0                      | 1   | 12 | 1   | 0   | 14    | 45              | 0.161    | 31    | 0.269    |
| 13                            | Denmark, Sealand      | 56°05'21" | 12°08'38" | 0                    | 15  | 2  | 0   | 0   | 17    | 0                      | 0   | 1  | 0   | 0   | 1     | 33              | 0.159    | 18    | 0.000    |
| 14a                           | Denmark, Sealand      | 55°58'53" | 12°12'15" | 0                    | 5   | 2  | 2   | 0   | 9     | 0                      | 0   | 2  | 3   | 0   | 5     | 19              | 0.154    | 19    | 0.115    |
| 14b                           | Denmark, Sealand      | 55°58'09" | 12°13'42" | 0                    | 0   | 1  | 5   | 0   | 6     | 0                      | 0   | 4  | 2   | 0   | 6     | 12              | 0.077    | 19    | 0.188    |
| 14c                           | Denmark, Sealand      | 55°58'03" | 12°13'47" | 0                    | 2   | 2  | 17  | 0   | 21    | 0                      | 0   | 0  | 6   | 0   | 6     | 29              | 0.066    | 50    | 0.193    |
| 15a                           | Denmark, Sealand      | 55°50'22" | 12°14'26" | 0                    | 4   | 3  | 0   | 0   | 7     | 0                      | 0   | 6  | 7   | 0   | 13    | 24              | 0.094    | 27    | 0.104    |
| 15b                           | Denmark, Sealand      | 55°50'11" | 12°12'44" | 0                    | 9   | 3  | 0   | 0   | 12    | 0                      | 0   | 17 | 2   | 0   | 19    | 40              | 0.040    | 33    | 0.065    |
| 16a                           | Denmark, Sealand      | 55°47'60" | 12°32'55" | 0                    | 9   | 2  | 0   | 0   | 11    | 0                      | 0   | 8  | 1   | 0   | 9     | 29              | 0.086    | 21    | 0.104    |
| 16b                           | Denmark, Sealand      | 55°48'04" | 12°34'42" | 0                    | 19  | 0  | 0   | 0   | 19    | 0                      | 0   | 0  | 0   | 0   | 0     | 38              | 0.095    | 19    | 0.053    |
| 17a                           | Denmark, Sealand      | 55°37'05" | 12°27'17" | 0                    | 0   | 1  | 0   | 0   | 1     | 0                      | 0   | 4  | 16  | 0   | 20    | 21              | 0.171    | 37    | 0.040    |
| 17b                           | Denmark, Sealand      | 55°37'00" | 12°29'32" | 0                    | 20  | 1  | 2   | 0   | 23    | 0                      | 1   | 2  | 4   | 0   | 7     | 51              | 0.109    | 36    | 0.038    |
| 18a                           | Denmark, Sealand      | 55°33'13" | 11°53'47" | 0                    | 9   | 5  | 1   | 0   | 15    | 0                      | 2   | 12 | 0   | 0   | 14    | 40              | 0.088    | 30    | 0.196    |
| 18b                           | Denmark, Sealand      | 55°33'14" | 11°53'06" | 0                    | 5   | 2  | 0   | 0   | 7     | 0                      | 2   | 6  | 1   | 0   | 9     | 23              | 0.076    | 17    | 0.209    |
| 18c                           | Denmark, Sealand      | 55°33'19" | 11°52'50" | 0                    | 5   | 6  | 0   | 0   | 11    | 0                      | 0   | 5  | 0   | 0   | 5     | 21              | 0.096    | 16    | 0.195    |
| 19a                           | Denmark, Sealand      | 55°17'23" | 11°50'18" | 0                    | 9   | 1  | 0   | 0   | 10    | 0                      | 4   | 4  | 9   | 0   | 17    | 40              | 0.146    | 36    | 0.309    |
| 19b                           | Denmark, Sealand      | 55°18'53" | 11°41'31" | 0                    | 0   | 3  | 12  | 0   | 15    | 0                      | 0   | 7  | 8   | 0   | 15    | 30              | 0.095    | 50    | 0.256    |
| 20a                           | Denmark, Sealand      | 55°00'31" | 12°00'17" | 0                    | 4   | 1  | 1   | 0   | 6     | 0                      | 1   | 14 | 6   | 0   | 21    | 32              | 0.073    | 34    | 0.182    |
| 20b                           | Denmark, Sealand      | 55°00'15" | 12°01'12" | 0                    | 6   | 7  | 2   | 0   | 15    | 0                      | 0   | 14 | 1   | 0   | 15    | 36              | 0.102    | 33    | 0.212    |
| 21a                           | Denmark, Agersø       | 55°13'29" | 11°11'12" | 0                    | 4   | 6  | 0   | 0   | 10    | 0                      | 0   | 5  | 3   | 0   | 8     | 22              | 0.214    | 21    | 0.344    |
| 21b                           | Denmark, Agersø       | 55°13'34" | 11°10'46" | 0                    | 16  | 3  | 0   | 0   | 19    | 0                      | 5   | 9  | 4   | 0   | 18    | 58              | 0.202    | 41    | 0.314    |
| 22a                           | Denmark, Enø          | 55°10'06" | 11°40'06" | 0                    | 12  | 1  | 0   | 0   | 13    | 0                      | 1   | 5  | 6   | 0   | 12    | 38              | 0.152    | 31    | 0.147    |
| 22b                           | Denmark, Enø          | 55°09'55" | 11°40'01" | 0                    | 12  | 1  | 0   | 0   | 13    | 0                      | 1   | 10 | 1   | 0   | 12    | 38              | 0.174    | 26    | 0.106    |
| 23a                           | Denmark, Knudsh. Odde | 55°04'37" | 11°39'15" | 0                    | 16  | 0  | 0   | 0   | 16    | 0                      | 6   | 4  | 0   | 0   | 10    | 48              | 0.179    | 26    | 0.027    |
| 23b                           | Denmark, Knudsh. Odde | 55°04'38" | 11°39'14" | 0                    | 14  | 1  | 0   | 0   | 15    | 0                      | 12  | 1  | 2   | 0   | 15    | 56              | 0.177    | 32    | 0.044    |
| 24a                           | Denmark, Møn          | 55°03'01" | 12°16'03" | 0                    | 5   | 9  | 1   | 0   | 15    | 0                      | 1   | 9  | 7   | 0   | 17    | 38              | 0.098    | 40    | 0.239    |
| 24b                           | Denmark, Møn          | 55°02'05" | 12°16'58" | 0                    | 7   | 8  | 0   | 0   | 15    | 0                      | 1   | 6  | 8   | 0   | 15    | 38              | 0.111    | 38    | 0.251    |
| 25a                           | Denmark, Lolland      | 54°47'30" | 11°00'11" | 0                    | 7   | 1  | 2   | 0   | 10    | 0                      | 11  | 3  | 4   | 0   | 18    | 46              | 0.199    | 34    | 0.196    |
| 25b                           | Denmark, Lolland      | 54°46'36" | 11°00'34" | 0                    | 8   | 6  | 1   | 0   | 15    | 0                      | 1   | 7  | 7   | 0   | 15    | 39              | 0.202    | 38    | 0.203    |
| 25c                           | Denmark, Lolland      | 54°45'17" | 11°02'45" | 0                    | 12  | 3  | 0   | 0   | 15    | 0                      | 6   | 10 | 9   | 0   | 25    | 58              | 0.189    | 49    | 0.213    |
| 26a                           | Denmark, Lolland      | 54°42'47" | 11°41'43" | 0                    | 19  | 0  | 0   | 0   | 19    | 0                      | 1   | 9  | 1   | 0   | 11    | 50              | 0.189    | 31    | 0.127    |
| 26b                           | Denmark, Lolland      | 54°42'55" | 11°39'56" | 0                    | 2   | 8  | 2   | 0   | 12    | 0                      | 0   | 16 | 3   | 0   | 19    | 33              | 0.192    | 36    | 0.075    |
| 138                           | Sweden, Scania        | 55°31'32" | 12°55'45" | 0                    | 1   | 8  | 1   | 0   | 10    | 0                      | 1   | 20 | 25  | 0   | 46    | 35              | 0.146    | 42    | 0.081    |
| 001                           | Sweden, Scania        | 55°35'17" | 13°21'15" | 2                    | 23  | 4  | 1   | 0   | 30    | 1                      | 8   | 10 | 10  | 0   | 29    | 54              | 0.150    | 39    | 0.119    |
| 011                           | Sweden, Scania        | 55°34'06" | 13°19'47" | 0                    | 7   | 22 | 0   | 0   | 29    | 0                      | 2   | 27 | 7   | 0   | 36    | 42              | 0.186    | 38    | 0.101    |
| 014                           | Sweden, Scania        | 55°34'08" | 13°19'01" | 0                    | 16  | 11 | 0   | 0   | 27    | 0                      | 9   | 15 | 5   | 0   | 29    | 49              | 0.177    | 33    | 0.192    |
| 032                           | Sweden, Scania        | 55°34'03" | 13°12'53" | 0                    | 14  | 23 | 0   | 0   | 37    | 0                      | 10  | 23 | 13  | 0   | 46    | 89              | 0.161    | 76    | 0.334    |
| 032A                          | Sweden, Scania        | 55°34'27" | 13°13'03" | 0                    | 5   | 9  | 0   | 0   | 14    | 0                      | 11  | 17 | 10  | 0   | 38    | 33              | 0.172    | 28    | 0.319    |
| 089                           | Sweden, Scania        | 55°36'34" | 13°23'19" | 0                    | 4   | 5  | 9   | 0   | 18    | 0                      | 2   | 10 | 33  | 0   | 45    | 39              | 0.173    | 61    | 0.101    |
| 102                           | Sweden, Scania        | 55°32'51" | 13°17'13" | 0                    | 17  | 7  | 0   | 0   | 24    | 0                      | 5   | 22 | 5   | 0   | 32    | 49              | 0.214    | 34    | 0.296    |
| 108                           | Sweden, Scania        | 55°33'09" | 13°16'08" | 0                    | 8   | 12 | 1   | 0   | 21    | 0                      | 4   | 18 | 7   | 0   | 29    | 28              | 0.167    | 25    | 0.248    |
| 111                           | Sweden, Scania        | 55°32'06" | 13°12'33" | 1                    | 10  | 34 | 1   | 0   | 46    | 0                      | 4   | 22 | 6   | 0   | 32    | 72              | 0.163    | 63    | 0.336    |
| 126                           | Sweden, Scania        | 55°33'59" | 13°14'12" | 0                    | 6   | 10 | 0   | 0   | 16    | 0                      | 6   | 13 | 22  | 0   | 41    | 36              | 0.178    | 40    | 0.299    |
| 134                           | Sweden, Scania        | 55°33'03" | 13°21'22" | 0                    | 3   | 16 | 0   | 0   | 19    | 0                      | 5   | 29 | 1   | 0   | 35    | 40              | 0.172    | 36    | 0.157    |

| Pond                          | Country                   | Latitude  | Longitude | Males > 55mm (LL>50) |     |     |     |     | Females > 55mm (LL>50) |                                                     |       |    |       | Genetic samples |                |                |                  |                |                  |
|-------------------------------|---------------------------|-----------|-----------|----------------------|-----|-----|-----|-----|------------------------|-----------------------------------------------------|-------|----|-------|-----------------|----------------|----------------|------------------|----------------|------------------|
|                               |                           |           |           | LL                   | LLR | LR  | LRR | RR  | n <sub>m</sub>         | LL                                                  | LLR   | LR | LRR   | RR              | n <sub>f</sub> | n <sub>L</sub> | H <sub>E</sub> L | n <sub>R</sub> | H <sub>E</sub> R |
| Pr                            | Germany Coast, continent  | 54°14'50" | 10°11'25" | 0                    | 2   | 5   | 0   | 0   | 7                      | 0                                                   | 0     | 3  | 0     | 0               | 3              | -              | -                | -              | -                |
| Fe11                          | Germany Coast, Fehmarn    | 54°31'16" | 11°03'12" | 0                    | 8   | 0   | 0   | 0   | 8                      | 0                                                   | 2     | 14 | 0     | 0               | 16             | -              | -                | -              | -                |
| Fe15                          | Germany Coast, Fehmarn    | 54°29'46" | 11°08'37" | 0                    | 15  | 1   | 0   | 0   | 16                     | 0                                                   | 1     | 7  | 0     | 0               | 8              | -              | -                | -              | -                |
| Fe16                          | Germany Coast, Fehmarn    | 54°29'45" | 11°08'51" | 0                    | 14  | 0   | 0   | 0   | 14                     | 0                                                   | 1     | 8  | 0     | 0               | 9              | -              | -                | -              | -                |
| Fe21                          | Germany Coast, Fehmarn    | 54°29'52" | 11°08'45" | 0                    | 14  | 1   | 1   | 0   | 16                     | 0                                                   | 2     | 4  | 0     | 0               | 6              | -              | -                | -              | -                |
| Fe70                          | Germany Coast, Fehmarn    | 54°25'35" | 11°06'38" | 0                    | 13  | 2   | 0   | 0   | 15                     | 0                                                   | 7     | 8  | 0     | 0               | 15             | -              | -                | -              | -                |
| Kl                            | Germany Coast, continent  | 53°59'29" | 11°00'47" | 0                    | 7   | 2   | 2   | 0   | 11                     | 0                                                   | 1     | 9  | 6     | 0               | 16             | -              | -                | -              | -                |
| Han7                          | Germany Coast, continent  | 54°02'27" | 11°54'41" | 0                    | 13  | 0   | 0   | 0   | 13                     | 0                                                   | 3     | 1  | 0     | 0               | 4              | -              | -                | -              | -                |
| Han10                         | Germany Coast, continent  | 54°02'44" | 11°53'58" | 0                    | 9   | 2   | 0   | 0   | 11                     | 0                                                   | 5     | 2  | 0     | 0               | 7              | -              | -                | -              | -                |
| Gr1                           | Germany Coast, continent  | 53°45'40" | 12°55'49" | 0                    | 3   | 3   | 0   | 0   | 6                      | 0                                                   | 5     | 6  | 0     | 0               | 11             | -              | -                | -              | -                |
| Gr11                          | Germany Coast, continent  | 53°41'36" | 12°51'11" | 0                    | 7   | 0   | 3   | 0   | 10                     | 0                                                   | 1     | 0  | 3     | 0               | 4              | -              | -                | -              | -                |
| Ru11                          | Germany Coast, Rügen      | 54°25'02" | 13°23'49" | 0                    | 17  | 0   | 0   | 0   | 17                     | 1*                                                  | 1     | 2  | 0     | 0               | 4              | -              | -                | -              | -                |
| Ru20                          | Germany Coast, Rügen      | 54°22'48" | 13°24'52" | 0                    | 5   | 0   | 0   | 0   | 5                      | 0                                                   | 1     | 9  | 0     | 0               | 10             | -              | -                | -              | -                |
| Ru43                          | Germany Coast, Rügen      | 54°21'25" | 13°26'01" | 0                    | 3   | 2   | 7   | 0   | 12                     | 0                                                   | 0     | 6  | 6     | 0               | 12             | -              | -                | -              | -                |
| Ru54                          | Germany Coast, Rügen      | 54°37'15" | 13°22'21" | 0                    | 9   | 3   | 1   | 0   | 13                     | 0                                                   | 4     | 6  | 3     | 0               | 13             | -              | -                | -              | -                |
| Ru74                          | Germany Coast, Rügen      | 54°16'33" | 13°42'49" | 0                    | 27  | 0   | 0   | 0   | 27                     | 0                                                   | 6     | 2  | 0     | 0               | 8              | -              | -                | -              | -                |
| UsZ                           | Germany Coast, Usedom     | 53°52'45" | 14°07'48" | 0                    | 10  | 1   | 0   | 0   | 11                     | 0                                                   | 0     | 0  | 0     | 0               | 0              | -              | -                | -              | -                |
| Us1                           | Germany Coast, Usedom     | 53°53'51" | 14°03'55" | 0                    | 6   | 0   | 0   | 0   | 6                      | 0                                                   | 0     | 2  | 2     | 0               | 4              | -              | -                | -              | -                |
| Ro4                           | Germany Coast, continent  | 53°34'26" | 13°46'04" | 1                    | 5   | 0   | 0   | 0   | 6                      | 0                                                   | 8     | 3  | 3     | 0               | 14             | -              | -                | -              | -                |
| Ro5                           | Germany Coast, continent  | 53°34'19" | 13°45'38" | 0                    | 9   | 5   | 0   | 0   | 14                     | 0                                                   | 2     | 7  | 1     | 0               | 10             | -              | -                | -              | -                |
| Do3                           | Germany Inland, continent | 52°49'44" | 09°16'18" | 0                    | 11  | 8   | 0   | 0   | 19                     | 0                                                   | 10    | 6  | 1     | 0               | 17             | 57             | 0.271            | 37             | 0.276            |
| Do18                          | Germany Inland, continent | 52°53'47" | 09°16'26" | 0                    | 0   | 4   | 2   | 0   | 6                      | 0                                                   | 0     | 9  | 2     | 0               | 11             | 17             | 0.223            | 21             | 0.399            |
| St                            | Germany Inland, continent | 52°49'44" | 09°21'27" | 0                    | 1   | 3   | 1   | 0   | 5                      | 0                                                   | 0     | 3  | 4     | 0               | 7              | 13             | 0.289            | 17             | 0.521            |
| Hee                           | Germany Inland, continent | 52°43'39" | 09°17'02" | 1                    | 7   | 3   | 0   | 0   | 11                     | 0                                                   | 1     | 0  | 0     | 0               | 1              | 21             | 0.305            | 11             | 0.409            |
| Ei                            | Germany Inland, continent | 52°43'54" | 09°36'45" | 0                    | 15  | 3   | 0   | 0   | 18                     | 0                                                   | 9     | 7  | 2     | 0               | 18             | 60             | 0.339            | 38             | 0.491            |
| Sc                            | Germany Inland, continent | 52°31'60" | 09°19'47" | 0                    | 1   | 13  | 0   | 0   | 14                     | 0                                                   | 0     | 6  | 3     | 0               | 9              | 24             | 0.306            | 26             | 0.206            |
| Eb                            | Germany Inland, continent | 53°03'20" | 10°27'14" | 0                    | 1   | 7   | 1   | 0   | 9                      | 0                                                   | 0     | 11 | 7     | 0               | 18             | 28             | 0.351            | 35             | 0.307            |
| Da                            | Germany Inland, continent | 53°29'17" | 11°51'44" | 0                    | 1   | 2   | 11  | 0   | 14                     | 0                                                   | 0     | 1  | 6     | 0               | 7              | 22             | 0.281            | 38             | 0.303            |
| Sh                            | Germany Inland, continent | 52°54'05" | 12°19'21" | 0                    | 4   | 4   | 2   | 0   | 10                     | 0                                                   | 2     | 4  | 4     | 0               | 10             | 26             | 0.314            | 26             | 0.393            |
| <b>Other breeding systems</b> |                           |           |           |                      |     |     |     |     |                        |                                                     |       |    |       |                 |                |                |                  |                |                  |
| Po                            | Germany Inland, continent | 52°28'24" | 09°28'28" | 1                    | 1   | 3   | 0   | 3   | 8                      | 1                                                   | 0     | 0  | 0     | 5               | 6              | 9              | 0.186            | 20             | 0.514            |
| Ha2                           | Germany Inland, continent | 52°15'23" | 11°13'04" | 0                    | 0   | 3   | 2   | 0   | 5                      | 0                                                   | 0     | 0  | 3     | 1*              | 3              | 8              | 0.269            | 15             | 0.460            |
| Ha6                           | Germany Inland, continent | 52°16'40" | 11°15'15" | 4                    | 2   | 3   | 0   | 0   | 9                      | 1                                                   | 1     | 3  | 1     | 0               | 6              | 23             | 0.313            | 11             | 0.468            |
| Her                           | Germany Inland, continent | 51°37'38" | 10°21'14" | 2                    | 0   | 7   | 0   | 15  | 24                     | 0                                                   | 0     | 3  | 0     | 0               | 3              | 14             | 0.492            | 40             | 0.370            |
| Bo3+4                         | Bornholm (Denmark)        | 55°08'39" | 15°03'42" | 0                    | 0   | 10  | 3   | 3   | 16                     | 0                                                   | 0     | 0  | 0     | 6               | 6              | -              | -                | -              | -                |
| Bo11                          | Bornholm (Denmark)        | 55°01'15" | 15°01'15" | 0                    | 6   | 3   | 25  | 0   | 34                     | 0                                                   | 1     | 0  | 10    | 0               | 11             | -              | -                | -              | -                |
| Bo12                          | Bornholm (Denmark)        | 55°03'25" | 15°00'15" | 0                    | 3   | 0   | 14  | 2   | 19                     | 0                                                   | 0     | 0  | 0     | 0               | 0              | -              | -                | -              | -                |
| Bo14                          | Bornholm (Denmark)        | 55°07'23" | 15°09'10" | 0                    | 6   | 24  | 5   | 0   | 35                     | 0                                                   | 0     | 4  | 2     | 0               | 6              | -              | -                | -              | -                |
| EE-NE                         | Baltic states, Estonia    | 59°05'14" | 23°31'60" | 19*                  | 0   | 0   | 0   | 0   | 19                     | Sex and length<br>not recorded<br>for Baltic frogs. |       |    |       |                 | 38             | 0.037          | 0                | -              |                  |
| EE-L                          | Baltic states, Estonia    | 58°25'42" | 26°19'08" | 27*                  | 0   | 0   | 0   | 0   | 27                     |                                                     |       |    |       |                 | -              | -              | -                | -              |                  |
| EE-P                          | Baltic states, Estonia    | 58°21'50" | 24°32'41" | 35*                  | 0   | 3*  | 0   | 0   | 38                     |                                                     |       |    |       |                 | -              | -              | -                | -              |                  |
| EE-T                          | Baltic states, Estonia    | 58°08'09" | 24°31'21" | 41*                  | 0   | 0   | 0   | 0   | 41                     |                                                     |       |    |       |                 | 82             | 0.322          | 0                | -              |                  |
| EE-H                          | Baltic states, Estonia    | 58°05'16" | 24°29'39" | 31*                  | 0   | 5*  | 0   | 0   | 36                     |                                                     |       |    |       |                 | 67             | 0.233          | 5                | -              |                  |
| LV-P                          | Baltic states, Latvia     | 57°33'13" | 24°44'52" | 13*                  | 0   | 9*  | 0   | 0   | 22                     |                                                     |       |    |       |                 | -              | -              | -                | -              |                  |
| LV-A                          | Baltic states, Latvia     | 57°31'05" | 24°56'38" | 38*                  | 0   | 0   | 0   | 0   | 38                     |                                                     |       |    |       |                 | 76             | 0.364          | 0                | -              |                  |
| LV-S                          | Baltic states, Latvia     | 57°19'41" | 22°15'22" | 27*                  | 0   | 6*  | 0   | 0   | 33                     |                                                     |       |    |       |                 | -              | -              | -                | -              |                  |
| LV-R                          | Baltic states, Latvia     | 57°00'33" | 23°10'54" | 36*                  | 0   | 4*  | 0   | 0   | 40                     |                                                     |       |    |       |                 | 76             | 0.380          | 4                | -              |                  |
| LV-J                          | Baltic states, Latvia     | 56°59'37" | 23°55'22" | 1*                   | 0   | 0   | 0   | 14* | 15                     |                                                     |       |    |       |                 | -              | -              | -                | -              |                  |
| LV-B                          | Baltic states, Latvia     | 56°22'52" | 24°10'06" | 36*                  | 0   | 5*  | 0   | 0   | 41                     | 77                                                  | 0.288 | 5  | -     |                 |                |                |                  |                |                  |
| LT-G                          | Baltic states, Lithuania  | 55°19'04" | 26°00'53" | 16*                  | 0   | 4*  | 0   | 0   | 20                     | -                                                   | -     | -  | -     |                 |                |                |                  |                |                  |
| LT-K                          | Baltic states, Lithuania  | 54°47'49" | 24°15'05" | 4*                   | 0   | 3*  | 0   | 20* | 27                     | 11                                                  | 0.374 | 43 | 0.615 |                 |                |                |                  |                |                  |
| LT-D                          | Baltic states, Lithuania  | 54°42'49" | 24°05'54" | 0                    | 0   | 19* | 0   | 10* | 29                     | -                                                   | -     | -  | -     |                 |                |                |                  |                |                  |
| LT-BV                         | Baltic states, Lithuania  | 54°28'44" | 25°07'59" | 16*                  | 0   | 16* | 0   | 1*  | 33                     | -                                                   | -     | -  | -     |                 |                |                |                  |                |                  |

\* Sex unknown
