# Supplementary material
Source: PubMed Central journal article supplement (PMC3183848)
Supplement: hdy201037x2.pdf [file hdy201037x2.pdf]

## Supplementary information 2.

**Microsatellite allele length ranges, number of alleles found (A) and genetic diversity ( $H_E$ ) in each genome, number of incongruent cases for each country (and number of ponds with >2 cases, where incongruent loci were not excluded but corrected) and the correction for incongruence.**

| Primer       | L alleles | R alleles | A L | A R | $H_E$ L | $H_E$ R | DK**   | SE** | D**   | Bal** | Incongruence correction         |
|--------------|-----------|-----------|-----|-----|---------|---------|--------|------|-------|-------|---------------------------------|
| Ca1b6*       | 74-90     | 83-96     | 5   | 10  | 0.109   | 0.476   | 1      | 1    | 23(3) | 4(1)  | L -> R (four different alleles) |
| Res16*       | 121+125   | 123+127   | 4   | 2   | 0.015   | 0.174   | 21(0)  | 7(0) | 24(5) | 1     | R -> L (two different alleles)  |
| RICA1b5*     | 119+145   | 132+134   | 2   | 2   | 0.001   | 0.288   | 2      | 3(0) | 2     |       |                                 |
| Ga1a19red.*  | 195+230   | 199-243   | 2   | 8   | 0.009   | 0.535   | 2      | 1    | 1     |       |                                 |
| Re1CAGA10    | 90-98     | 95-185    | 4   | 28  | 0.041   | 0.797   | 2      | 1    | 3(1)  |       | L -> null                       |
| Rrid059Ared. | 278       | 300-337   | 1   | 13  | 0.000   | 0.590   |        |      | 2     |       |                                 |
| RICA2a34     | 113-156   | 106+109   | 17  | 3   | 0.666   | 0.033   | 9(1)   |      | 3(0)  | 17(2) | L -> null (DK), R -> null (Bal) |
| Rrid013A     | 290-302   | 281+287   | 5   | 2   | 0.158   | 0.068   |        | 1    | 14(2) |       | L -> null                       |
| Res20        | 85-151    |           | 22  |     | 0.549   |         |        |      |       | 2     |                                 |
| RICA5        | 233-264   |           | 11  |     | 0.510   |         | 1      | 2    | 12(1) |       | L -> R                          |
| ReGA1a23     | 98-139    |           | 17  |     | 0.786   |         | 1      |      |       |       |                                 |
| RICA1a27     | 95-141    |           | 15  |     | 0.717   |         | 1      |      | 1     |       |                                 |
| RICA18       | 171-196   |           | 12  |     | 0.259   |         |        |      |       |       |                                 |
| Re2CAGA3     |           | 169-236   |     | 13  |         | 0.784   | 1      |      | 1     | 5(1)  | R -> L                          |
| Rrid064A     |           | 211-235   |     | 6   |         | 0.649   | 256(9) |      |       | 2     | R -> null in all Jutland ponds  |
| Res22        |           | 82-124    |     | 14  |         | 0.721   |        |      | 5(0)  |       |                                 |
| Rrid169A     |           | 176-203   |     | 11  |         | 0.567   |        | 6(1) | 23(3) | 12(2) | R -> null                       |
| Rrid135A     |           | 107-207   |     | 9   |         | 0.520   |        |      |       |       |                                 |

\* Dosage effect when the L and R alleles are not too different in length. Dosage effects were clearer with Ga1a19redesigned and Res16 than with Ca1b6 and, especially, RICA1b5.

\*\* Total sample sizes: DK (Denmark) 1562 individuals (54 ponds), SE (Sweden, first sample only) 409 (12), Bal (Baltic states) 224 (12) and D (Germany) 312 (13).
